# Supplementary material for: Mineral Dust Influence on the Glacial Nitrate Record from the RICEIce Core, West Antarctica and Environmental Implications
Source: Copernicus journal article supplement (doi:10.5194/cp-2020-151), 2020-12-10
Supplement: Supplementary file 1 [file cp-2020-151-supplement.pdf]

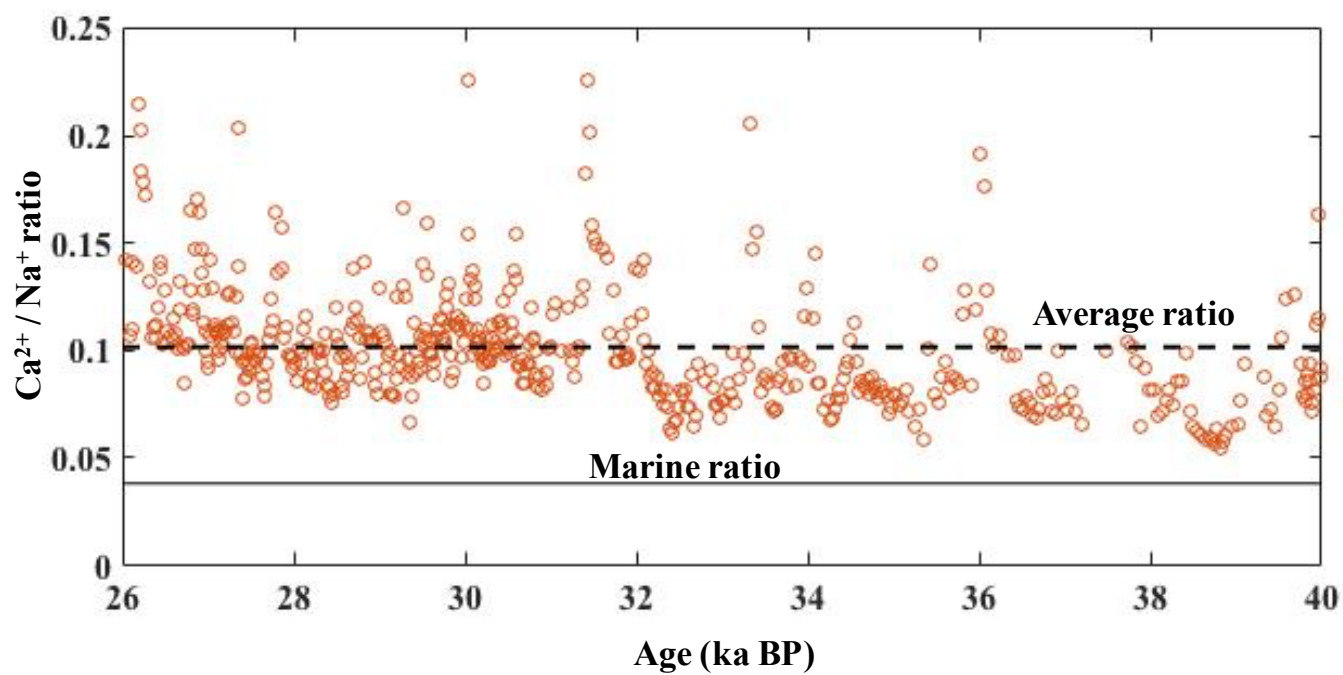

Figure S1. Calcium to Sodium ratio in the Samples Between 26 - 40 ka BP. Sea water ratio for  $\text{Ca}^{2+}/\text{Na}^{+}$  and the average ratio in the samples are shown using black dashed and plane lines, respectively.

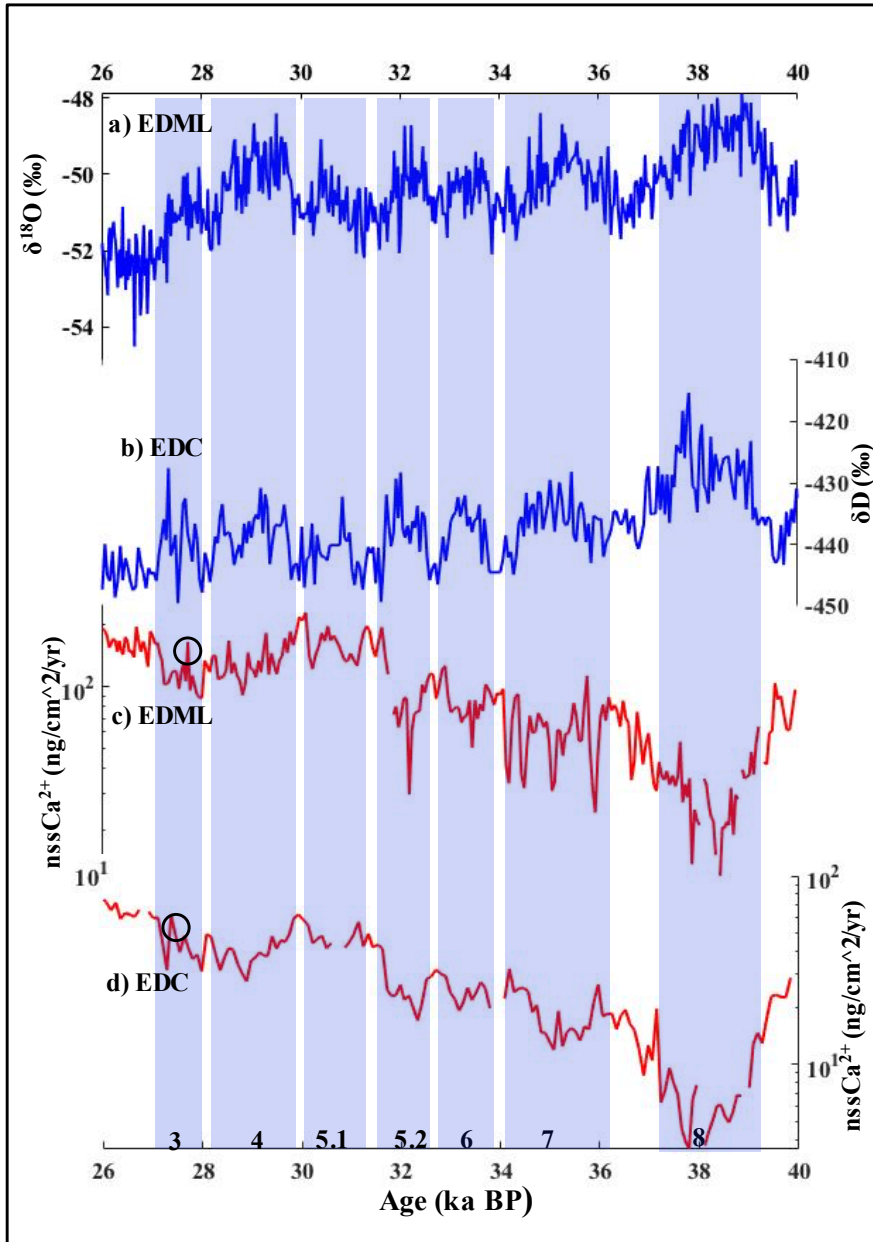

**Figure S2.** Plot of water isotopes (proxy for temperature) (a, b) and  $nssCa^{2+}$  fluxes (c, d) in EPICA Dronning Maud Land (EDML) and EDC from 26 - 40 ka BP (Fischer et al., 2007a). AIM events are shown in blue bars and are numbered at the bottom. Events where  $nssCa^{2+}$  flux shows centennial-scale peaks within the millennial-scale drop are indicated using black circles.

5

10
